# Supplementary material for: Is a High Tone Pointy? Speakers of Different Languages Match Mandarin Chinese Tones to Visual Shapes Differently
Source: PubMed Central journal article supplement (PMC5726031; doi:10.3389/fpsyg.2017.02139), 2017-12-07
Supplement: Data_Sheet_1.pdf [file Data_Sheet_1.pdf]

## *Supplementary Materials*

Shang N and Styles SJ (2017) Is a High Tone Pointy? Speakers of Different Languages Match Mandarin Chinese Tones to Visual Shapes Differently. *Front. Psychol.* 8:2139. doi: 10.3389/fpsyg.2017.02139

Table S1. Self-proficiency rating scale

1. "I can speak easily about most things without thinking about how to say them"

---

2. "I can talk about many things, but I often need to think about how to put my words together when I speak"

---

3. "I can understand most of what people are saying but I can only think how to reply sometimes"

---

4. "I can understand some of what people are saying but I usually can't think how to reply"

---

5. "I have taken lessons and have begun practicing how to say certain kinds of words and sentences"

Table S2. Self-reported language levels

| Group | Language Level (Range) |         |
|-------|------------------------|---------|
|       | Chinese                | English |
| C     | 1                      | 2-4     |
| C/E   | 1-2                    | 1-3     |
| E     | N/A                    | 1-2     |

Table S3. Rating of typicality of the auditory stimuli

| Sounds | Median | Range |
|--------|--------|-------|
| i1     | 6      | 5-7   |
| i2     | 6      | 3-7   |
| i3     | 6      | 4-7   |
| i4     | 5      | 4-7   |
| u1     | 5      | 4-7   |
| u2     | 5      | 3-7   |
| u3     | 6      | 4-7   |
| u4     | 5      | 3-7   |

## Full Statistical reports

### Study 1: Two shapes with one sound

Table S4. GLMM Fixed Effects (Study 1, overall)

|                            | F       | df1 | df2 | Sig. |
|----------------------------|---------|-----|-----|------|
| Vowel                      | 140.108 | 1   | 776 | .000 |
| Tone                       | 4.538   | 3   | 776 | .004 |
| Language                   | 1.184   | 2   | 776 | .307 |
| Language * Vowel           | 1.869   | 2   | 776 | .155 |
| Language * Tone            | 1.867   | 6   | 776 | .084 |
| Vowel * Tone               | .959    | 3   | 776 | .411 |
| Language * Vowel *<br>Tone | 1.09    | 6   | 776 | .367 |

Table S5. GLMM Fixed Effects (Study 1, [i])

|                 | F     | df1 | df2 | Sig. |
|-----------------|-------|-----|-----|------|
| Tone            | 4.052 | 3   | 388 | .007 |
| Language        | 1.19  | 2   | 388 | .305 |
| Language * Tone | 1.71  | 6   | 388 | .117 |

Table S6. GLMM Fixed Effects (Study 1, [u])

|                 | F     | df1 | df2 | Sig. |
|-----------------|-------|-----|-----|------|
| Tone            | 4.807 | 3   | 388 | .003 |
| Language        | .946  | 2   | 388 | .393 |
| Language * Tone | 2.82  | 6   | 388 | .011 |

Table S7. GLMM Fixed Effects (Study 1, [u], CE : ENG)

|                 | F     | df1 | df2 | Sig. |
|-----------------|-------|-----|-----|------|
| Tone            | 1.957 | 3   | 212 | .121 |
| Language        | .177  | 1   | 212 | .674 |
| Language * Tone | 3.013 | 3   | 212 | .031 |

Table S8. Pairwise comparisons between tones (Study 1)

| Vowel | Tone<br>comparison | C/E      | C        | E        |
|-------|--------------------|----------|----------|----------|
|       |                    | <i>p</i> | <i>p</i> | <i>p</i> |
| u     | 1&2                | .180     | .013     | .332     |
| u     | 1&3                | .109     | .049     | .302     |
| u     | 1&4                | .007     | .003     | .607     |
| u     | 2&3                | 1.000    | .503     | >.999    |
| u     | 2&4                | .180     | 1.000    | .754     |
| u     | 3&4                | .302     | .359     | .754     |
| u     | 1&4 vs. 2&3        | >.999    | 243      | .041     |

Table S9. GLMM Fixed Effects (Study 1, [u], C: ENG)

|                 | F     | df1 | df2 | Sig. |
|-----------------|-------|-----|-----|------|
| Tone            | 1.63  | 3   | 272 | .183 |
| Language        | .754  | 1   | 272 | .386 |
| Language * Tone | 3.784 | 3   | 272 | .011 |

Table S10. GLMM Fixed Effects (Study 1, [u], C: CE)

|                 | F      | df1 | df2 | Sig.  |
|-----------------|--------|-----|-----|-------|
| Tone            | 12.279 | 3   | 292 | <.001 |
| Language        | 1.574  | 1   | 292 | .211  |
| Language * Tone | .099   | 3   | 292 | .961  |

## Study 2: Two sounds with one shape

### T1/T4 – The Pitch-Change Pair

Table S11. GLMM Fixed Effects (Study 2, T1-T4, overall)

|                  | F     | df1 | df2 | Sig. |
|------------------|-------|-----|-----|------|
| Shape            | 7.829 | 1   | 202 | .006 |
| Language         | .639  | 2   | 202 | .529 |
| Language * Shape | 7.353 | 2   | 202 | .001 |

Table S12. GLMM Fixed Effects (Study 2, T1-T4, CE vs. E)

|                  | F     | df1 | df2 | Sig. |
|------------------|-------|-----|-----|------|
| Shape            | .931  | 1   | 142 | .336 |
| Language         | 1.144 | 1   | 142 | .287 |
| Language * Shape | 6.086 | 1   | 142 | .015 |

Table S13. GLMM Fixed Effects (Study 2, T1-T4, C vs. E)

|                  | F      | df1 | df2 | Sig.  |
|------------------|--------|-----|-----|-------|
| Shape            | 3.753  | 1   | 156 | .055  |
| Language         | <.001  | 1   | 156 | .986  |
| Language * Shape | 12.723 | 1   | 156 | <.001 |

Table S14. GLMM Fixed Effects (Study 2, T1-T4, C vs. CE)

|                  | F      | df1 | df2 | Sig.  |
|------------------|--------|-----|-----|-------|
| Shape            | 14.042 | 1   | 106 | <.001 |
| Language         | <.001  | 1   | 106 | .341  |
| Language * Shape | 12.723 | 1   | 106 | .471  |

### T1/T3 – The Pitch-Height Pair

Table S15. GLMM Fixed Effects (Study 2, T1-T3, overall)

|                  | F      | df1 | df2 | Sig.  |
|------------------|--------|-----|-----|-------|
| Shape            | 20.469 | 1   | 202 | <.001 |
| Language         | 2.753  | 2   | 202 | .066  |
| Language * Shape | 8.027  | 2   | 202 | <.001 |

Table S16. GLMM Fixed Effects (Study 2, T1-T3, CE vs. E)

|                  | F      | df1 | df2 | Sig.  |
|------------------|--------|-----|-----|-------|
| Shape            | 30.046 | 1   | 142 | <.001 |
| Language         | 3.536  | 1   | 142 | .062  |
| Language * Shape | 1.289  | 1   | 142 | .258  |



Table S17. GLMM Fixed Effects (Study 2, T1-T3, C vs. E)

|                  | F      | df1 | df2 | Sig.  |
|------------------|--------|-----|-----|-------|
| Shape            | 12.936 | 1   | 156 | <.001 |
| Language         | 4.385  | 1   | 156 | .038  |
| Language * Shape | 15.659 | 1   | 156 | <.001 |

Table S18. GLMM Fixed Effects (Study 2, T1-T3, C vs. CE)

|                  | F     | df1 | df2 | Sig. |
|------------------|-------|-----|-----|------|
| Shape            | 4.04  | 1   | 106 | .047 |
| Language         | .002  | 1   | 106 | .963 |
| Language * Shape | 5.405 | 1   | 106 | .022 |

# Supplementary Figures

## Study 1: Two shapes with one sound

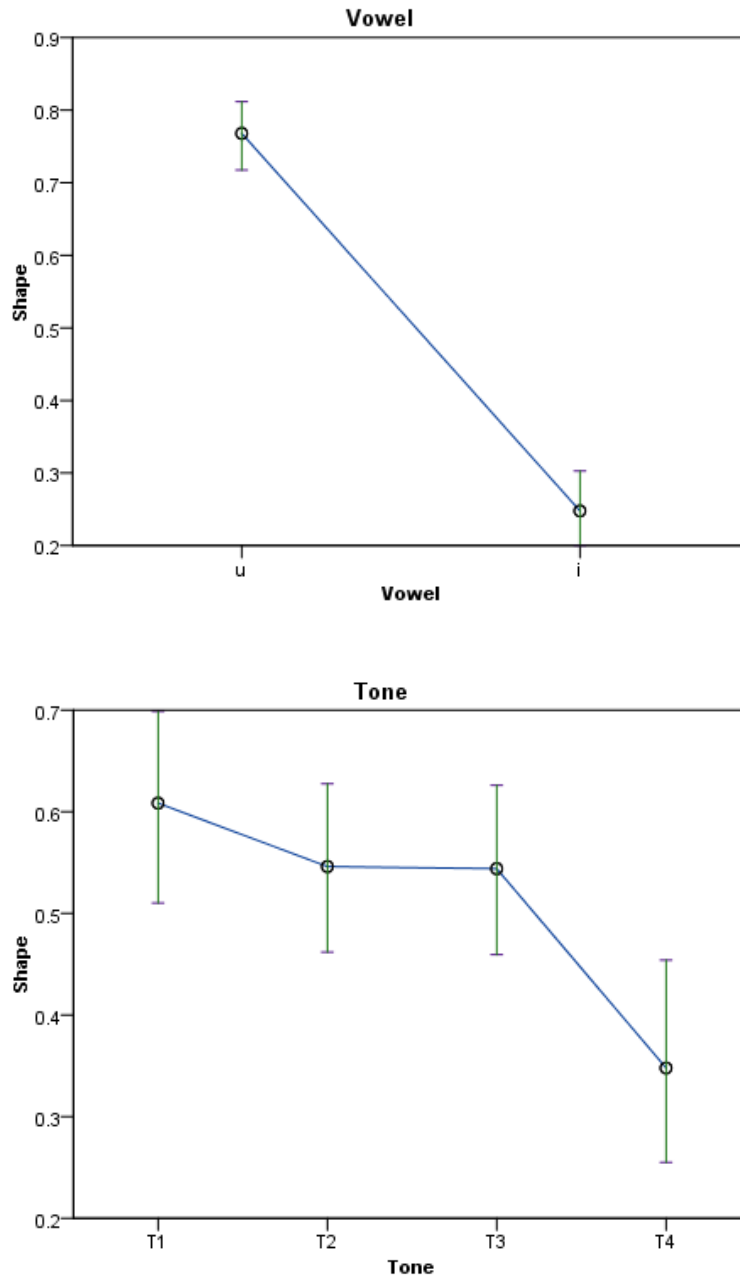

Figure S1. Estimated Means for significant effects (0=pointy) (Study 1: overall)

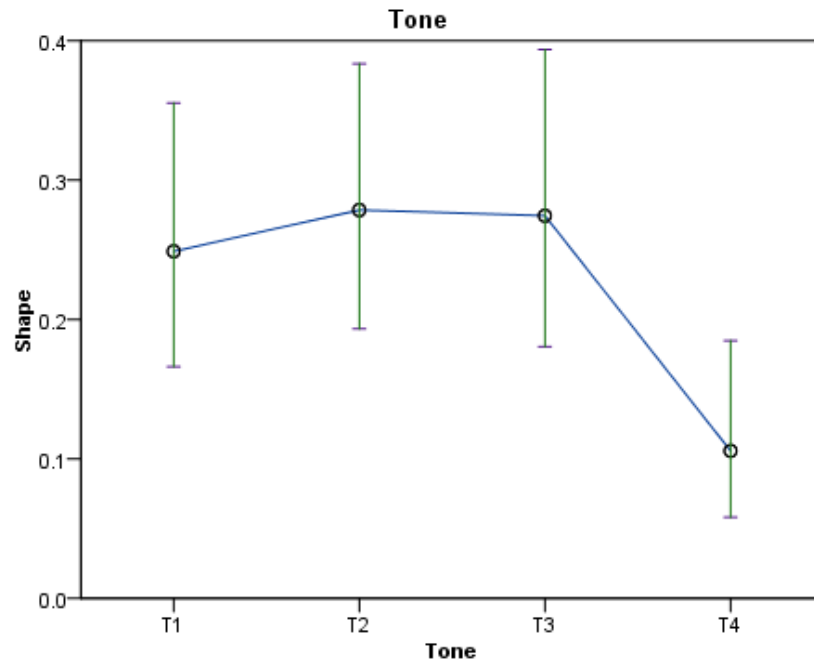

Figure S2. Estimated Means for significant effects (0=pointy) (Study 1: [i])

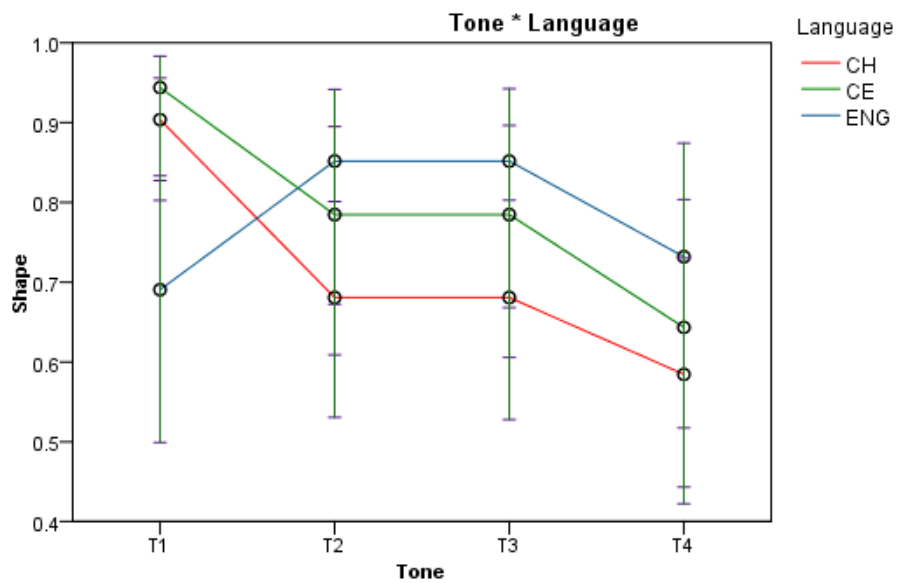

Figure S3. Estimated Means for significant effects (0=pointy) (Study 1: [u])

## Study 2: Two sounds with one shape

### T1/T4 – The Pitch-Change Pair

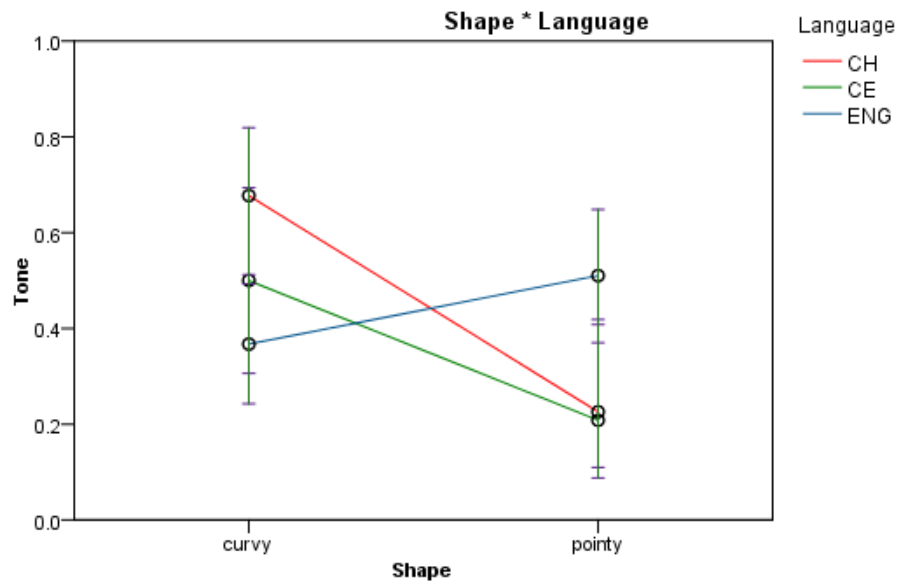

Figure S4. Estimated Means for significant effects (0=T4) (Study 2, T1-T4: overall)

T1/T3 – The Pitch-Height Pair

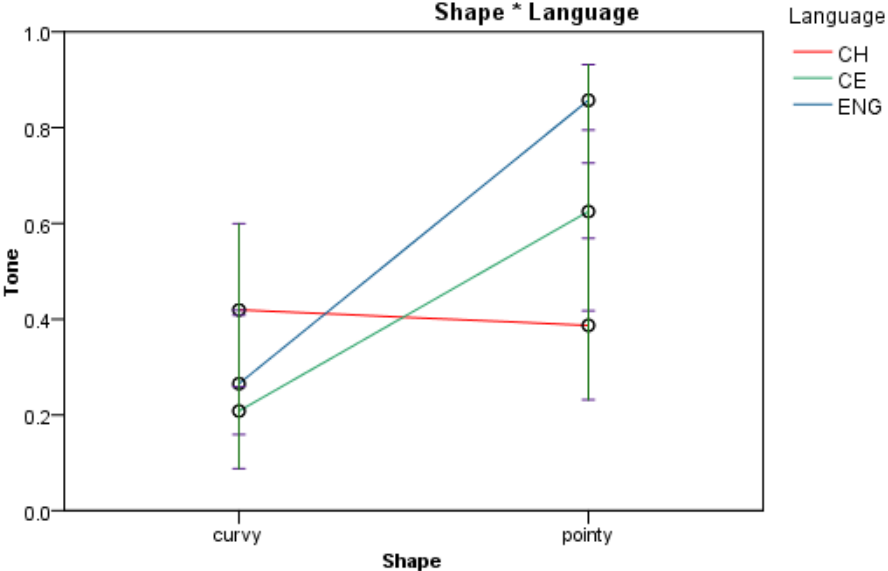

Figure S5. Estimated Means for significant effects (0=T3) (Study 2, T1-T3: overall)
